# Supplementary material
Source: PubMed Central journal article supplement (PMC2666851)
Supplement: NIHMS81669-supplement-Supplementary.pdf [file NIHMS81669-supplement-Supplementary.pdf]

## Supplemental Materials

**sTable 1.** Species, common name and taxonomy of eukaryotic organisms. (see attached Table)

**sFig. 1.** Identification of Oanat BAC clones carrying the *SLC26A5* gene. Panel A shows hybridization of P-32 labeled mouse prestin on a BAC Oanat genomic library with three positive clones. An enlarged image of the region within the red box shows the arrangement of the duplicate positive clones. The method for identifying the locations of the clones based on 6 fields within each filter and the arrangement for identification of the duplicated individual clones. In Panel B four BAC clones were selected and analyzed by Southern blotting (B) and restriction enzymes BamHI, EcoRI and HindIII were used.

**sFig. 2.** Alignment of the eutherian SLC26A4 proteins. Alignments of the pendrin (SLC26A4) polypeptides are shown with the deduced polypeptide sequences being compared with the consensus eutherian SLC26A4 sequence. The eutherian species are arranged from high to low frequency specialists. The amino acid alignments are presented with identical residues to the initial polypeptide being represented as dots. Background color of each residue is presented using RasMOL color designations (Sayle and Milner-White, 1995). Gaps in the aligned sequences are indicated by the dashed line. The consensus sequence, residue conservation and utilization (Sequence logo) are provided and missing of sequence data is indicated by X. Residue numbers are provided at the top of each row of sequence. A 1 kb ladder (Invitrogen, Carlsbad, CA) was used as the DNA fragment size marker.

**sFig. 3.** Alignment of the eutherian SLC26A6 proteins. The amino acid alignments of the CFX (SLC26A6) proteins are presented with identical residues represented as dots. The eutherian species are arranged from high to low frequency specialists. Background color of each residue is presented using RasMOL color designations (Sayle and Milner-White, 1995). Gaps in the aligned sequences are indicated by the dashed line. The residue conservation and utilization (Sequence logo) are provided and absence of sequence data is indicated by X. Residue numbers are provided at the top of each row of sequence.

sFig. 1. Identification of Oanat BAC clones carrying the *SLC26A5* gene.

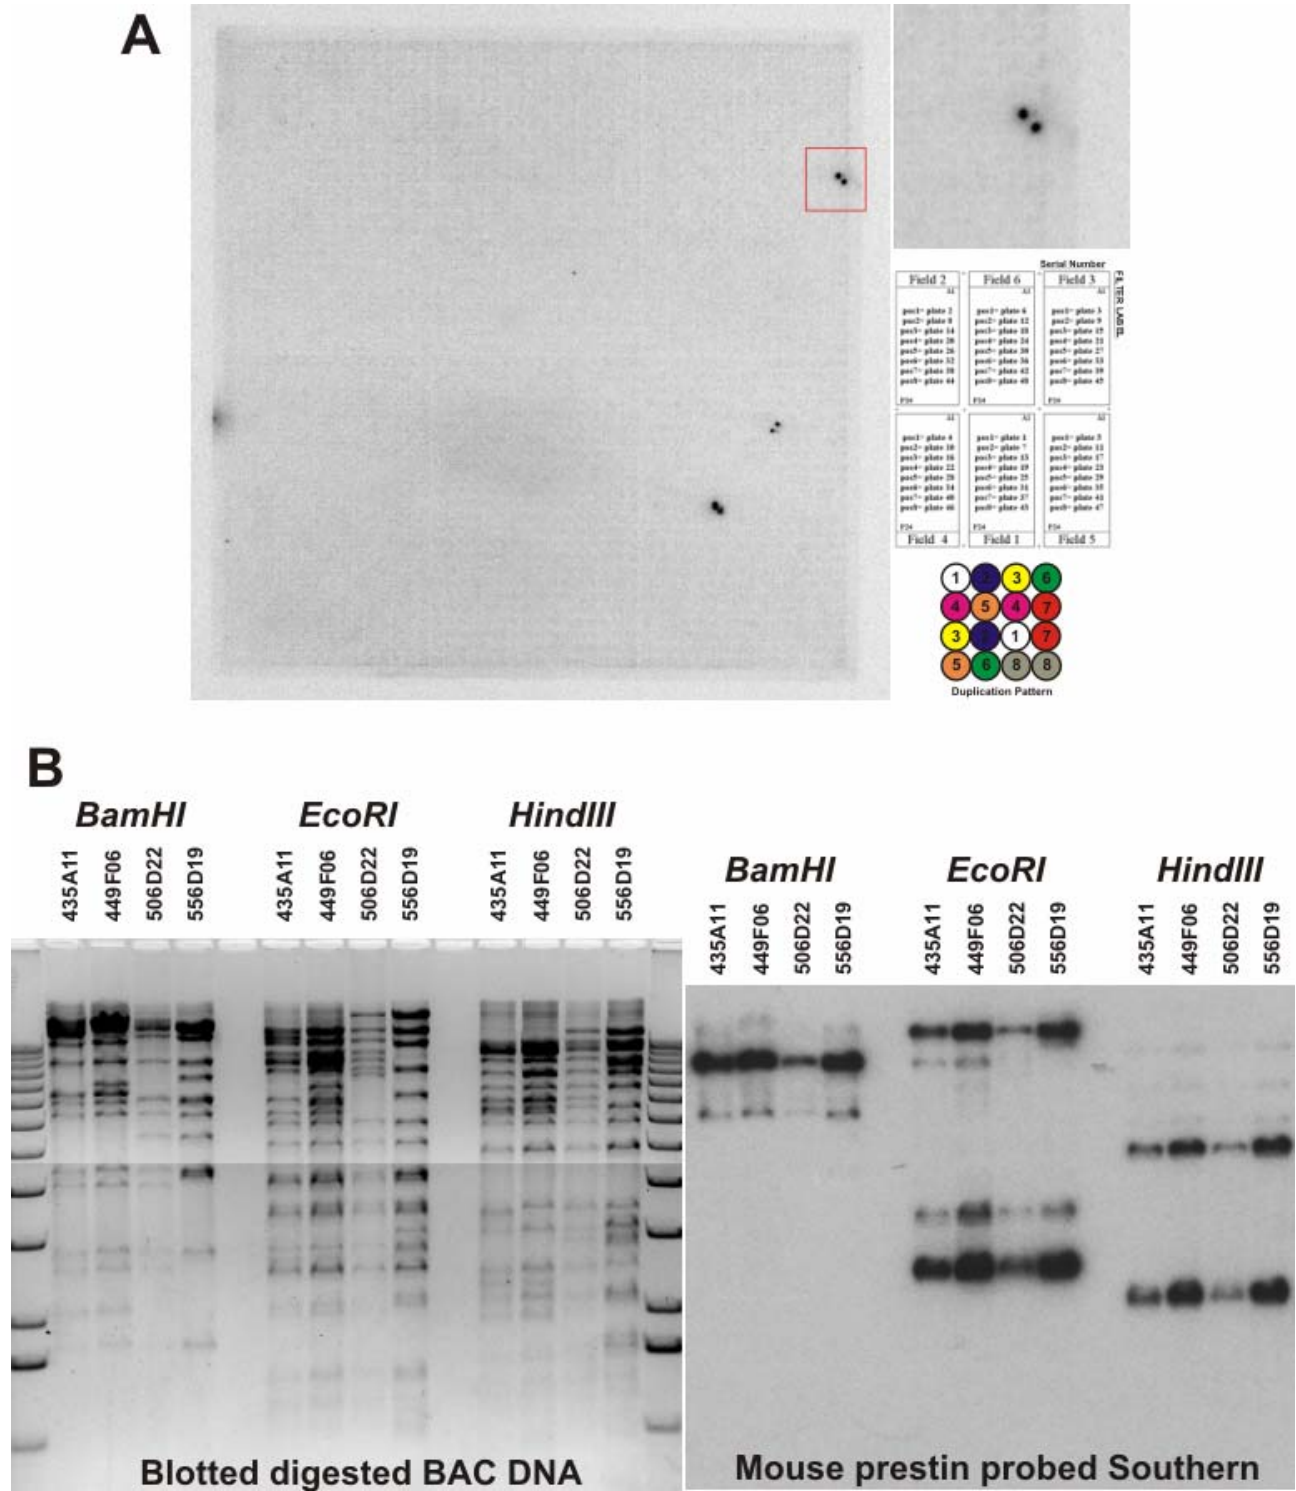





sFig. 3. Alignment of the eutherian SLC26A6 proteins.

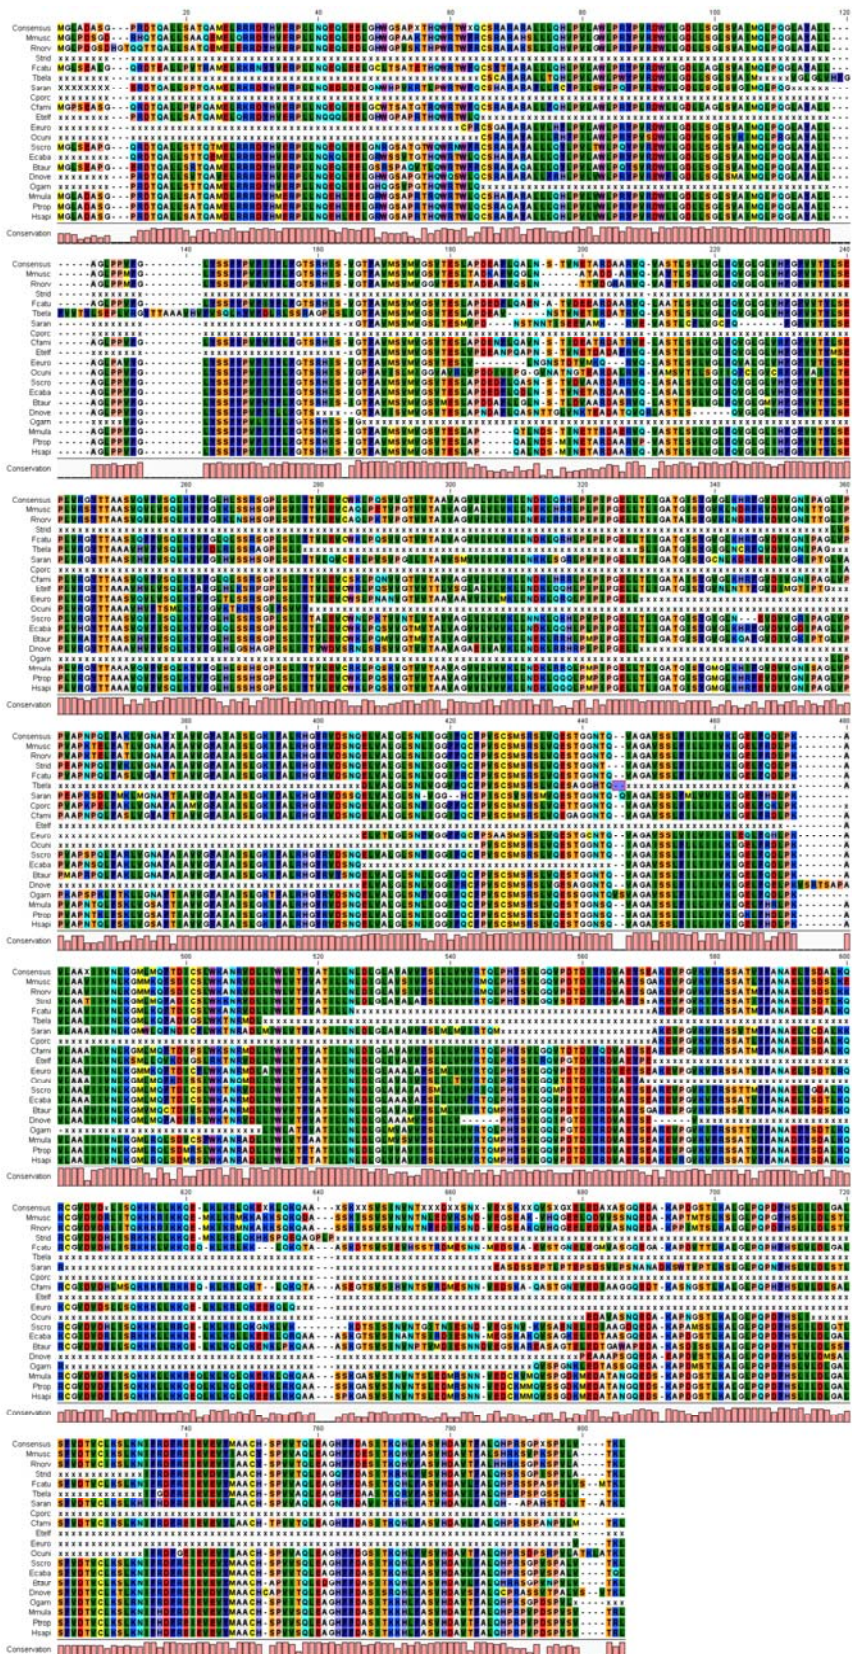

| Organism                 |                                      |               |       | Taxonomy                                                                                                                                                                                                                                                                                                                                                                                                                                                                                                   |
|--------------------------|--------------------------------------|---------------|-------|------------------------------------------------------------------------------------------------------------------------------------------------------------------------------------------------------------------------------------------------------------------------------------------------------------------------------------------------------------------------------------------------------------------------------------------------------------------------------------------------------------|
| Common Name              | Species                              | Taxonomy I.D. |       |                                                                                                                                                                                                                                                                                                                                                                                                                                                                                                            |
| Slime mold               | <i>Dictyostelium discoideum</i>      | <i>Ddisc</i>  | 44689 | Eukaryota; Mycetozoa; Dictyosteliida; Dictyostelium                                                                                                                                                                                                                                                                                                                                                                                                                                                        |
| Yeast                    | <i>Saccharomyces cerevisiae</i>      | <i>Scere</i>  | 4932  | Eukaryota; Fungi/Metazoa group; Fungi; Dikarya; Ascomycota; Saccharomycotina; Saccharomycetes; Saccharomycetales; Saccharomycetaceae; Saccharomyces                                                                                                                                                                                                                                                                                                                                                        |
| Choanoflagellate         | <i>Monosiga brevicollis</i>          | <i>Mbrev</i>  | 81824 | Eukaryota; Fungi/Metazoa group; Choanoflagellida; Codonosigidae; Monosiga                                                                                                                                                                                                                                                                                                                                                                                                                                  |
| Worm                     | <i>Caenorhabditis elegans</i>        | <i>Celeg</i>  | 6239  | Eukaryota; Fungi/Metazoa group; Metazoa; Eumetazoa; Bilateria; Pseudocoelomata; Nematoda; Chromadorea; Rhabditida; Rhabditoidea; Rhabditidae; Peloderinae; Caenorhabditis                                                                                                                                                                                                                                                                                                                                  |
| Fruit fly                | <i>Drosophila melanogaster</i>       | <i>Dmela</i>  | 7227  | Eukaryota; Fungi/Metazoa group; Metazoa; Eumetazoa; Bilateria; Coelomata; Protostomia; Panarthropoda; Arthropoda; Mandibulata; Pancrustacea; Hexapoda; Insecta; Dicondylia; Pterygota; Neoptera; Endopterygota; Diptera; Brachycera; Muscomorpha; Eremoneura; Cyclorhapha; Schizophora; Acalyptratae; Ephydroidea; Drosophilidae; Drosophilinae; Drosophilini; Drosophilina; Drosophilini; Drosophila; Sophophora                                                                                          |
| Honey bee                | <i>Apis mellifera</i>                | <i>Amell</i>  | 7460  | Eukaryota; Fungi/Metazoa group; Metazoa; Eumetazoa; Bilateria; Coelomata; Protostomia; Panarthropoda; Arthropoda; Mandibulata; Pancrustacea; Hexapoda; Insecta; Dicondylia; Pterygota; Neoptera; Endopterygota; Hymenoptera; Apocrita; Aculeata; Apoidea; Apidae; Apinae; Apini; Apis                                                                                                                                                                                                                      |
| African malaria mosquito | <i>Anopheles gambiae</i>             | <i>Agamb</i>  | 7165  | Eukaryota; Fungi/Metazoa group; Metazoa; Eumetazoa; Bilateria; Coelomata; Protostomia; Panarthropoda; Arthropoda; Mandibulata; Pancrustacea; Hexapoda; Insecta; Dicondylia; Pterygota; Neoptera; Endopterygota; Diptera; Nematocera; Culicimorpha; Culicoidea; Culicidae; Anophelinae; Anopheles; Cellia; Pyretophorus; gambiae species complex                                                                                                                                                            |
| Yellow fever mosquito    | <i>Aedes aegypti</i>                 | <i>Aaegy</i>  | 7159  | Eukaryota; Fungi/Metazoa group; Metazoa; Eumetazoa; Bilateria; Coelomata; Protostomia; Panarthropoda; Arthropoda; Mandibulata; Pancrustacea; Hexapoda; Insecta; Dicondylia; Pterygota; Neoptera; Endopterygota; Diptera; Nematocera; Culicimorpha; Culicoidea; Culicidae; Culicinae; Culicini; Aedes/Ochlerotatus group; Aedes; Stegomyia                                                                                                                                                                  |
| Red flour beetle         | <i>Tribolium castaneum</i>           | <i>Tcast</i>  | 7070  | Eukaryota; Fungi/Metazoa group; Metazoa; Eumetazoa; Bilateria; Coelomata; Protostomia; Panarthropoda; Arthropoda; Mandibulata; Pancrustacea; Hexapoda; Insecta; Dicondylia; Pterygota; Neoptera; Endopterygota; Coleoptera; Polyphaga; Cucujiformia; Tenebrionoidea; Tenebrionidae; Tribolium                                                                                                                                                                                                              |
| Purple sea urchin        | <i>Strongylocentrotus purpuratus</i> | <i>Spurp</i>  | 7668  | Eukaryota; Fungi/Metazoa group; Metazoa; Eumetazoa; Bilateria; Coelomata; Deuterostomia; Echinodermata; Eleutherozoa; Echinozoa; Echinoidea; Euechinoidea; Echinacea; Echinoida; Strongylocentrotidae; Strongylocentrotus                                                                                                                                                                                                                                                                                  |
| Transparent sea squirt   | <i>Ciona intestinalis</i>            | <i>Cinte</i>  | 7719  | Eukaryota; Fungi/Metazoa group; Metazoa; Eumetazoa; Bilateria; Coelomata; Deuterostomia; Chordata; Urochordata; Ascidiacea; Enterogona; Phlebobranchia; Cionidae; Ciona                                                                                                                                                                                                                                                                                                                                    |
| Pacific sea squirt       | <i>Ciona savignyi</i>                | <i>Csavi</i>  | 51511 | Eukaryota; Fungi/Metazoa group; Metazoa; Eumetazoa; Bilateria; Coelomata; Deuterostomia; Chordata; Urochordata; Ascidiacea; Enterogona; Phlebobranchia; Cionidae; Ciona                                                                                                                                                                                                                                                                                                                                    |
| Fugu                     | <i>Takifugu rubripes</i>             | <i>Trubr</i>  | 31033 | Eukaryota; Fungi/Metazoa group; Metazoa; Eumetazoa; Bilateria; Coelomata; Deuterostomia; Chordata; Craniata; Vertebrata; Gnathostomata; Teleostomi; Euteleostomi; Actinopterygii; Actinopteri; Neopterygii; Teleostei; Elopoccephala; Clupeoccephala; Euteleostei; Neognathi; Neoteleostei; Eurypterygii; Ctenosquamata; Acanthomorpha; Euacanthomorpha; Holacanthopterygii; Acanthopterygii; Euacanthopterygii; Percomorpha; Tetraodontiformes; Tetraodontoidei; Tetradontoidea; Tetraodontidae; Takifugu |



|                              |                                 |              |        |                                                                                                                                                                                                                                                                                                                                                                                                                                                                                                                                                           |
|------------------------------|---------------------------------|--------------|--------|-----------------------------------------------------------------------------------------------------------------------------------------------------------------------------------------------------------------------------------------------------------------------------------------------------------------------------------------------------------------------------------------------------------------------------------------------------------------------------------------------------------------------------------------------------------|
| Mefugu                       | <i>Takifugu obscurus</i>        | <i>Trubr</i> | 309541 | Eukaryota; Fungi/Metazoa group; Metazoa; Eumetazoa; Bilateria; Coelomata; Deuterostomia; Chordata; Craniata; Vertebrata; Gnathostomata; Teleostomi; Euteleostomi; <b>Actinopterygii</b> ; Actinopteri; Neopterygii; <b>Teleostei</b> ; Elopoccephala; Clupeoccephala; Euteleostei; Neognathi; Neoteleostei; Eurypterygii; Ctenosquamata; Acanthomorpha; Euacanthomorpha; Holacanthopterygii; <b>Acanthopterygii</b> ; Euacanthopterygii; Percomorpha; Tetraodontiformes; Tetraodontoidei; Tetradontoidea; Tetraodontidae; Takifugu                        |
| Tetraodon                    | <i>Tetraodon nigroviridis</i>   | <i>Tnigr</i> | 99883  | Eukaryota; Fungi/Metazoa group; Metazoa; Eumetazoa; Bilateria; Coelomata; Deuterostomia; Chordata; Craniata; Vertebrata; Gnathostomata; Teleostomi; Euteleostomi; <b>Actinopterygii</b> ; Actinopteri; Neopterygii; <b>Teleostei</b> ; Elopoccephala; Clupeoccephala; Euteleostei; Neognathi; Neoteleostei; Eurypterygii; Ctenosquamata; Acanthomorpha; Euacanthomorpha; Holacanthopterygii; <b>Acanthopterygii</b> ; Euacanthopterygii; Percomorpha; Tetraodontiformes; Tetraodontoidei; Tetradontoidea; Tetraodontidae; Tetraodon                       |
| Japanese medaka              | <i>Oryzias latipes</i>          | <i>Olati</i> | 8090   | Eukaryota; Fungi/Metazoa group; Metazoa; Eumetazoa; Bilateria; Coelomata; Deuterostomia; Chordata; Craniata; Vertebrata; Gnathostomata; Teleostomi; Euteleostomi; <b>Actinopterygii</b> ; Actinopteri; Neopterygii; <b>Teleostei</b> ; Elopoccephala; Clupeoccephala; Euteleostei; Neognathi; Neoteleostei; Eurypterygii; Ctenosquamata; Acanthomorpha; Euacanthomorpha; Holacanthopterygii; <b>Acanthopterygii</b> ; Euacanthopterygii; Percomorpha; Smegmamorpha; Atherinomorpha; Beloniformes; Adrianichthyoidei; Adrianichthyidae; Oryziinae; Oryzias |
| Three-spined stickleback     | <i>Gasterosteus aculeatus</i>   | <i>Gacul</i> | 69293  | Eukaryota; Fungi/Metazoa group; Metazoa; Eumetazoa; Bilateria; Coelomata; Deuterostomia; Chordata; Craniata; Vertebrata; Gnathostomata; Teleostomi; Euteleostomi; <b>Actinopterygii</b> ; Actinopteri; Neopterygii; <b>Teleostei</b> ; Elopoccephala; Clupeoccephala; Euteleostei; Neognathi; Neoteleostei; Eurypterygii; Ctenosquamata; Acanthomorpha; Euacanthomorpha; Holacanthopterygii; <b>Acanthopterygii</b> ; Euacanthopterygii; Percomorpha; Smegmamorpha; Gasterosteiformes; Gasterosteoidi; Gasterosteidae; Gasterosteus                       |
| Zebrafish                    | <i>Danio rerio</i>              | <i>Dreri</i> | 7955   | Eukaryota; Fungi/Metazoa group; Metazoa; Eumetazoa; Bilateria; Coelomata; Deuterostomia; Chordata; Craniata; Vertebrata; Gnathostomata; Teleostomi; Euteleostomi; <b>Actinopterygii</b> ; Actinopteri; Neopterygii; <b>Teleostei</b> ; Elopoccephala; Clupeoccephala; Otocephala; Ostariophysii; Otophysi; Cypriniphysi; Cypriniformes; Cyprinoidea; Cyprinidae; Rasborinae; Danio                                                                                                                                                                        |
| African clawed frog          | <i>Xenopus laevis</i>           | <i>Xlaev</i> | 8355   | Eukaryota; Fungi/Metazoa group; Metazoa; Eumetazoa; Bilateria; Coelomata; Deuterostomia; Chordata; Craniata; Vertebrata; Gnathostomata; Teleostomi; Euteleostomi; Sarcopterygii; Tetrapoda; <b>Amphibia</b> ; Batrachia; Anura; Mesobatrachia; Pipoidea; Pipidae; Xenopodinae; Xenopus; Xenopus                                                                                                                                                                                                                                                           |
| Chicken                      | <i>Gallus gallus</i>            | <i>Ggall</i> | 9031   | Eukaryota; Fungi/Metazoa group; Metazoa; Eumetazoa; Bilateria; Coelomata; Deuterostomia; Chordata; Craniata; Vertebrata; Gnathostomata; Teleostomi; Euteleostomi; Sarcopterygii; Tetrapoda; <b>Amniota</b> ; Sauropsida; Sauria; Archosauria; Dinosauria; Saurischia; Theropoda; Coelurosauria; Aves; Neognathae; Galliformes; Phasianidae; Phasianinae; Gallus                                                                                                                                                                                           |
| Duck-billed platypus         | <i>Ornithorhynchus anatinus</i> | <i>Oanat</i> | 9258   | Eukaryota; Fungi/Metazoa group; Metazoa; Eumetazoa; Bilateria; Coelomata; Deuterostomia; Chordata; Craniata; Vertebrata; Gnathostomata; Teleostomi; Euteleostomi; Sarcopterygii; Tetrapoda; Amniota; <b>Mammalia</b> ; Prototheria; Monotremata; Ornithorhynchidae; Ornithorhynchus                                                                                                                                                                                                                                                                       |
| Gray short-tailed opossum    | <i>Monodelphis domestica</i>    | <i>Mdome</i> | 13616  | Eukaryota; Fungi/Metazoa group; Metazoa; Eumetazoa; Bilateria; Coelomata; Deuterostomia; Chordata; Craniata; Vertebrata; Gnathostomata; Teleostomi; Euteleostomi; Sarcopterygii; Tetrapoda; Amniota; <b>Mammalia</b> ; Theria; Metatheria; Didelphimorphia; Didelphidae; Didelphinae; Monodelphis                                                                                                                                                                                                                                                         |
| Madagascar hedgehog (Tenrec) | <i>Echinops telfairi</i>        | <i>Etelf</i> | 9371   | Eukaryota; Fungi/Metazoa group; Metazoa; Eumetazoa; Bilateria; Coelomata; Deuterostomia; Chordata; Craniata; Vertebrata; Gnathostomata; Teleostomi; Euteleostomi; Sarcopterygii; Tetrapoda; Amniota; <b>Mammalia</b> ; Theria; Eutheria; Afrotheria; Tenrecidae; Tenrecinae; Echinops                                                                                                                                                                                                                                                                     |

|                                |                                      |              |       |                                                                                                                                                                                                                                                                                                                                                       |
|--------------------------------|--------------------------------------|--------------|-------|-------------------------------------------------------------------------------------------------------------------------------------------------------------------------------------------------------------------------------------------------------------------------------------------------------------------------------------------------------|
| African elephant               | <i>Loxodonta africana</i>            | <i>Lafri</i> | 9785  | Eukaryota; Fungi/Metazoa group; Metazoa; Eumetazoa; Bilateria; Coelomata; Deuterostomia; Chordata; Craniata; Vertebrata; Gnathostomata; Teleostomi; Euteleostomi; Sarcopterygii; Tetrapoda; Amniota; <b>Mammalia</b> ; Theria; Eutheria; Afrotheria; Proboscidea; Elephantidae; <b>Loxodonta</b>                                                      |
| Nine-banded armadillo          | <i>Dasyus novemcinctus</i>           | <i>Dnove</i> | 9361  | Eukaryota; Fungi/Metazoa group; Metazoa; Eumetazoa; Bilateria; Coelomata; Deuterostomia; Chordata; Craniata; Vertebrata; Gnathostomata; Teleostomi; Euteleostomi; Sarcopterygii; Tetrapoda; Amniota; <b>Mammalia</b> ; Theria; Eutheria; Xenarthra; Dasypodidae; <b>Dasyus</b>                                                                        |
| Microbat                       | <i>Myotis lucifugus</i>              | <i>Mluci</i> | 59463 | Eukaryota; Fungi/Metazoa group; Metazoa; Eumetazoa; Bilateria; Coelomata; Deuterostomia; Chordata; Craniata; Vertebrata; Gnathostomata; Teleostomi; Euteleostomi; Sarcopterygii; Tetrapoda; Amniota; <b>Mammalia</b> ; Theria; Eutheria; Laurasiatheria; Chiroptera; <b>Microchiroptera</b> ; Vespertilionidae; <b>Myotis</b>                         |
| European shrew                 | <i>Sorex araneus</i>                 | <i>Saran</i> | 42254 | Eukaryota; Fungi/Metazoa group; Metazoa; Eumetazoa; Bilateria; Coelomata; Deuterostomia; Chordata; Craniata; Vertebrata; Gnathostomata; Teleostomi; Euteleostomi; Sarcopterygii; Tetrapoda; Amniota; <b>Mammalia</b> ; Theria; Eutheria; Laurasiatheria; Insectivora; Soricidae; <b>Soricinae</b> ; <b>Sorex</b>                                      |
| European hedgehog              | <i>Erinaceus europaeus</i>           | <i>Eeuro</i> | 9365  | Eukaryota; Fungi/Metazoa group; Metazoa; Eumetazoa; Bilateria; Coelomata; Deuterostomia; Chordata; Craniata; Vertebrata; Gnathostomata; Teleostomi; Euteleostomi; Sarcopterygii; Tetrapoda; Amniota; <b>Mammalia</b> ; Theria; Eutheria; Laurasiatheria; Insectivora; Erinaceidae; <b>Erinaceinae</b> ; <b>Erinaceus</b>                              |
| Pig                            | <i>Sus scrofa</i>                    | <i>Sscro</i> | 9823  | Eukaryota; Fungi/Metazoa group; Metazoa; Eumetazoa; Bilateria; Coelomata; Deuterostomia; Chordata; Craniata; Vertebrata; Gnathostomata; Teleostomi; Euteleostomi; Sarcopterygii; Tetrapoda; Amniota; <b>Mammalia</b> ; Theria; Eutheria; Laurasiatheria; Cetartiodactyla; Suina; <b>Suidae</b> ; <b>Sus</b>                                           |
| Cow                            | <i>Bos taurus</i>                    | <i>Btaur</i> | 9913  | Eukaryota; Fungi/Metazoa group; Metazoa; Eumetazoa; Bilateria; Coelomata; Deuterostomia; Chordata; Craniata; Vertebrata; Gnathostomata; Teleostomi; Euteleostomi; Sarcopterygii; Tetrapoda; Amniota; <b>Mammalia</b> ; Theria; Eutheria; Laurasiatheria; Cetartiodactyla; <b>Ruminantia</b> ; Pecora; Bovidae; Bovinae; <b>Bos</b>                    |
| Horse                          | <i>Equus caballus</i>                | <i>Ecaba</i> | 9796  | Eukaryota; Fungi/Metazoa group; Metazoa; Eumetazoa; Bilateria; Coelomata; Deuterostomia; Chordata; Craniata; Vertebrata; Gnathostomata; Teleostomi; Euteleostomi; Sarcopterygii; Tetrapoda; Amniota; <b>Mammalia</b> ; Theria; Eutheria; Laurasiatheria; Perissodactyla; Equidae; <b>Equus</b>                                                        |
| Dog                            | <i>Canis familiaris</i>              | <i>Cfami</i> | 9615  | Eukaryota; Fungi/Metazoa group; Metazoa; Eumetazoa; Bilateria; Coelomata; Deuterostomia; Chordata; Craniata; Vertebrata; Gnathostomata; Teleostomi; Euteleostomi; Sarcopterygii; Tetrapoda; Amniota; <b>Mammalia</b> ; Theria; Eutheria; Laurasiatheria; Carnivora; Caniformia; <b>Canidae</b> ; Canis; <b>Canis lupus</b>                            |
| Cat                            | <i>Felis catus</i>                   | <i>Fcatt</i> | 9685  | Eukaryota; Fungi/Metazoa group; Metazoa; Eumetazoa; Bilateria; Coelomata; Deuterostomia; Chordata; Craniata; Vertebrata; Gnathostomata; Teleostomi; Euteleostomi; Sarcopterygii; Tetrapoda; Amniota; <b>Mammalia</b> ; Theria; Eutheria; Laurasiatheria; Carnivora; Feliformia; <b>Felidae</b> ; Felinae; <b>Felis</b>                                |
| Rabbit                         | <i>Oryctolagus cuniculus</i>         | <i>Ocuni</i> | 9986  | Eukaryota; Fungi/Metazoa group; Metazoa; Eumetazoa; Bilateria; Coelomata; Deuterostomia; Chordata; Craniata; Vertebrata; Gnathostomata; Teleostomi; Euteleostomi; Sarcopterygii; Tetrapoda; Amniota; <b>Mammalia</b> ; Theria; Eutheria; Euarchontoglires; Glires; Lagomorpha; <b>Leporidae</b> ; <b>Oryctolagus</b>                                  |
| Thirteen-lined ground squirrel | <i>Spermophilus tridecemlineatus</i> | <i>Strid</i> | 43179 | Eukaryota; Fungi/Metazoa group; Metazoa; Eumetazoa; Bilateria; Coelomata; Deuterostomia; Chordata; Craniata; Vertebrata; Gnathostomata; Teleostomi; Euteleostomi; Sarcopterygii; Tetrapoda; Amniota; <b>Mammalia</b> ; Theria; Eutheria; Euarchontoglires; Glires; Rodentia; <b>Sciurognathi</b> ; Sciuridae; Xerinae; Marmotini; <b>Spermophilus</b> |
| Guinea pig                     | <i>Cavia porcellus</i>               | <i>Cporc</i> | 10141 | Eukaryota; Fungi/Metazoa group; Metazoa; Eumetazoa; Bilateria; Coelomata; Deuterostomia; Chordata; Craniata; Vertebrata; Gnathostomata; Teleostomi; Euteleostomi; Sarcopterygii; Tetrapoda; Amniota; <b>Mammalia</b> ; Theria; Eutheria; Euarchontoglires; Glires; Rodentia; <b>Hystricognathi</b> ; Caviidae; <b>Cavia</b>                           |

|                  |                              |              |       |                                                                                                                                                                                                                                                                                                                                                                       |
|------------------|------------------------------|--------------|-------|-----------------------------------------------------------------------------------------------------------------------------------------------------------------------------------------------------------------------------------------------------------------------------------------------------------------------------------------------------------------------|
| Mongolian gerbil | <i>Meriones unguiculatus</i> | <i>Mungu</i> | 10047 | Eukaryota; Fungi/Metazoa group; Metazoa; Eumetazoa; Bilateria; Coelomata; Deuterostomia; Chordata; Craniata; Vertebrata; Gnathostomata; Teleostomi; Euteleostomi; Sarcopterygii; Tetrapoda; Amniota; <b>Mammalia</b> ; Theria; Eutheria; Euarchontoglires; Glires; Rodentia; Sciurognathi; Muroidea; Muridae; Gerbillinae; Meriones                                   |
| Norway rat       | <i>Rattus norvegicus</i>     | <i>Rnorv</i> | 10116 | Eukaryota; Fungi/Metazoa group; Metazoa; Eumetazoa; Bilateria; Coelomata; Deuterostomia; Chordata; Craniata; Vertebrata; Gnathostomata; Teleostomi; Euteleostomi; Sarcopterygii; Tetrapoda; Amniota; <b>Mammalia</b> ; Theria; Eutheria; Euarchontoglires; Glires; Rodentia; Sciurognathi; Muroidea; Muridae; Murinae; Rattus                                         |
| Mouse            | <i>Mus musculus</i>          | <i>Mmusc</i> | 10090 | Eukaryota; Fungi/Metazoa group; Metazoa; Eumetazoa; Bilateria; Coelomata; Deuterostomia; Chordata; Craniata; Vertebrata; Gnathostomata; Teleostomi; Euteleostomi; Sarcopterygii; Tetrapoda; Amniota; <b>Mammalia</b> ; Theria; Eutheria; Euarchontoglires; Glires; Rodentia; Sciurognathi; Muroidea; Muridae; Murinae; Mus                                            |
| Tree shrew       | <i>Tupaia belangeri</i>      | <i>Tbela</i> | 37347 | Eukaryota; Fungi/Metazoa group; Metazoa; Eumetazoa; Bilateria; Coelomata; Deuterostomia; Chordata; Craniata; Vertebrata; Gnathostomata; Teleostomi; Euteleostomi; Sarcopterygii; Tetrapoda; Amniota; <b>Mammalia</b> ; Theria; Eutheria; Euarchontoglires; Scandentia; Tupaiidae; Tupaia                                                                              |
| Bushbaby         | <i>Otolemur garnettii</i>    | <i>Ogarn</i> | 30611 | Eukaryota; Fungi/Metazoa group; Metazoa; Eumetazoa; Bilateria; Coelomata; Deuterostomia; Chordata; Craniata; Vertebrata; Gnathostomata; Teleostomi; Euteleostomi; Sarcopterygii; Tetrapoda; Amniota; <b>Mammalia</b> ; Theria; Eutheria; Euarchontoglires; Primates; Strepsirrhini; Lorisiformes; Galagidae; Otolemur                                                 |
| Orangutan        | <i>Pongo pygmaeus</i>        | <i>Ppygm</i> | 9600  | Eukaryota; Fungi/Metazoa group; Metazoa; Eumetazoa; Bilateria; Coelomata; Deuterostomia; Chordata; Craniata; Vertebrata; Gnathostomata; Teleostomi; Euteleostomi; Sarcopterygii; Tetrapoda; Amniota; <b>Mammalia</b> ; Theria; Eutheria; Euarchontoglires; Primates; Haplorrhini; Simiiformes; Catarrhini; Hominoidea; Hominidae; Pongo                               |
| Rhesus monkey    | <i>Macaca mulatta</i>        | <i>Mmula</i> | 9544  | Eukaryota; Fungi/Metazoa group; Metazoa; Eumetazoa; Bilateria; Coelomata; Deuterostomia; Chordata; Craniata; Vertebrata; Gnathostomata; Teleostomi; Euteleostomi; Sarcopterygii; Tetrapoda; Amniota; <b>Mammalia</b> ; Theria; Eutheria; Euarchontoglires; Primates; Haplorrhini; Simiiformes; Catarrhini; Cercopithecoidea; Cercopithecidae; Cercopithecinae; Macaca |
| Chimpanzee       | <i>Pan troglodytes</i>       | <i>Ptrog</i> | 9598  | Eukaryota; Fungi/Metazoa group; Metazoa; Eumetazoa; Bilateria; Coelomata; Deuterostomia; Chordata; Craniata; Vertebrata; Gnathostomata; Teleostomi; Euteleostomi; Sarcopterygii; Tetrapoda; Amniota; <b>Mammalia</b> ; Theria; Eutheria; Euarchontoglires; Primates; Haplorrhini; Simiiformes; Catarrhini; Hominoidea; Hominidae; Homo/Pan/Gorilla group; Pan         |
| Human            | <i>Homo sapiens</i>          | <i>Hsapi</i> | 9606  | Eukaryota; Fungi/Metazoa group; Metazoa; Eumetazoa; Bilateria; Coelomata; Deuterostomia; Chordata; Craniata; Vertebrata; Gnathostomata; Teleostomi; Euteleostomi; Sarcopterygii; Tetrapoda; Amniota; <b>Mammalia</b> ; Theria; Eutheria; Euarchontoglires; Primates; Haplorrhini; Simiiformes; Catarrhini; Hominoidea; Hominidae; Homo/Pan/Gorilla group; Homo        |
